# Supplementary material for: Characterization of major ripening events during softening in grape: turgor, sugar accumulation, abscisic acid metabolism, colour development, and their relationship with growth
Source: PubMed Central journal article supplement (PMC4737070; doi:10.1093/jxb/erv483), 2015-11-17
Supplement: supp_erv483_Supplementary_figures_S1_S5_Tables_S1_S4.pdf [file supp_erv483_Supplementary_figures_S1_S5_Tables_S1_S4.pdf]

**Title:** Characterization of major ripening events during softening in grape: turgor, sugar accumulation, ABA metabolism, color development, and their relationship with growth.

**Authors:** Simone D. Castellarin, Gregory A. Gambetta, Hiroshi Wada, Mark N. Krasnow, Grant R. Cramer, Enrico Peterlunger, Kenneth A. Shackel, Mark A. Matthews

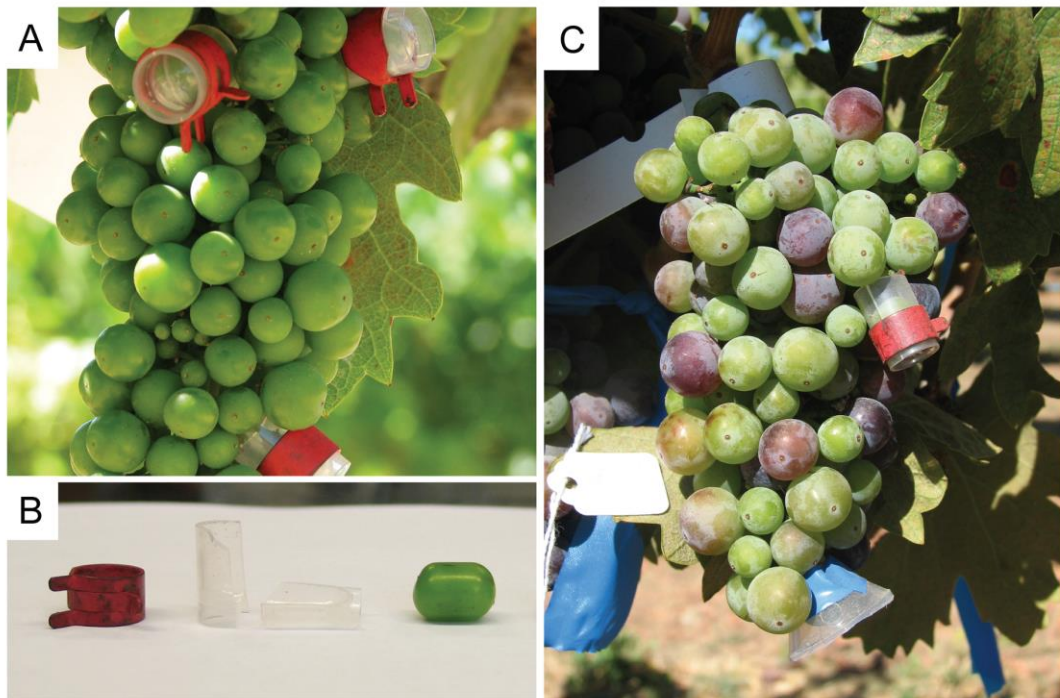

**Figure S1.** Restricting growth of Zinfandel berries in the field. A, Individual berries on whole clusters were boxed at random using modified cryotubes and tubing clamps. B, Boxes could be removed without harming the berry by simply removing the clamp. C, mock boxes were used as controls to assess possible indirect effects of on berry microclimate.

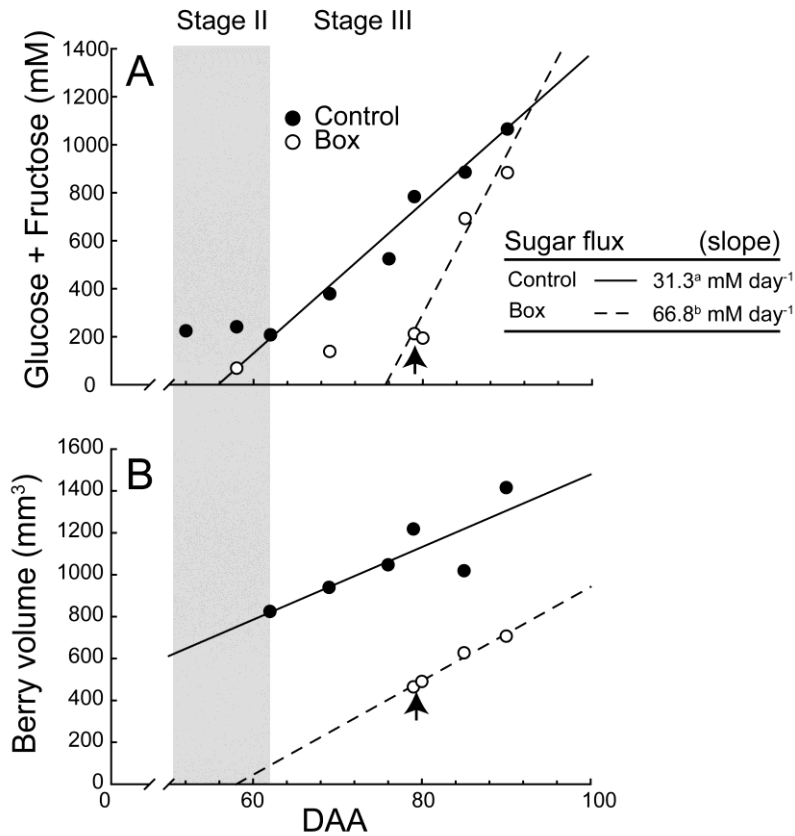

**Figure S2.** Relationships between sugar accumulation and growth in Control and Box. A, Rate of sugar accumulation (rate in Control and Box berries is reported in table). Slopes of linear regressions are significantly different ( $P = 0.004$ ). Points are averages taken from Figure 4C. B, linear regressions of the relationship between berry volume (calculated from average berry radius data; Fig. 1) and DAA. Boxes were removed at 79 DAA (arrows).

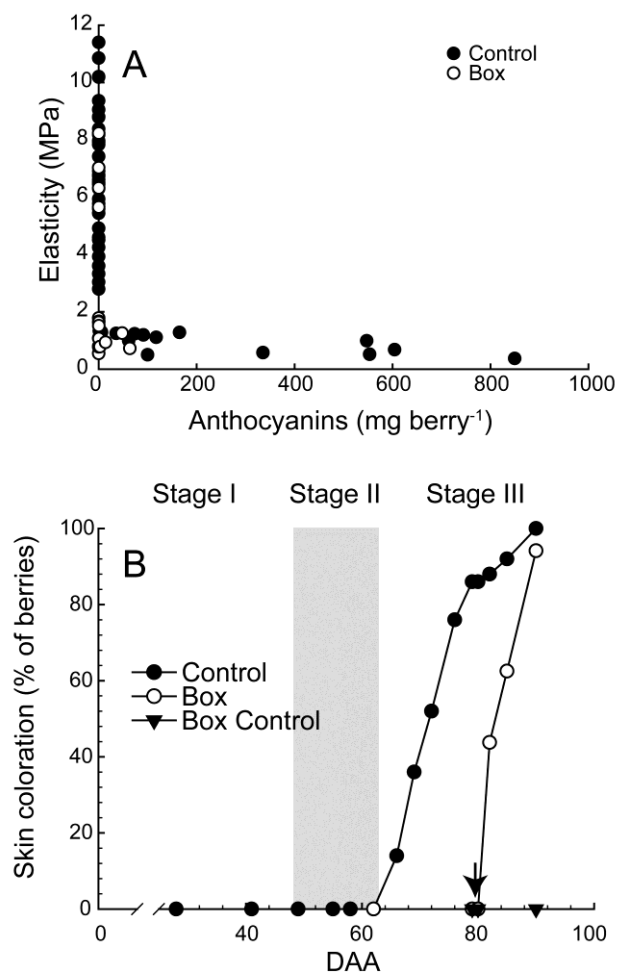

**Figure S3.** Relationship between anthocyanin accumulation and elasticity, and box effects on percent coloured berries. A, Anthocyanin accumulation in berry skins as a function of elasticity in Control and Box berries. B, Colour development in Control (n=50), Box, (n=12) and Box Control (n=1-3) berries. Boxes were removed at 79 DAA (arrows) and Box Controls remained boxed on the cluster and remained colourless for the duration of the experiment.

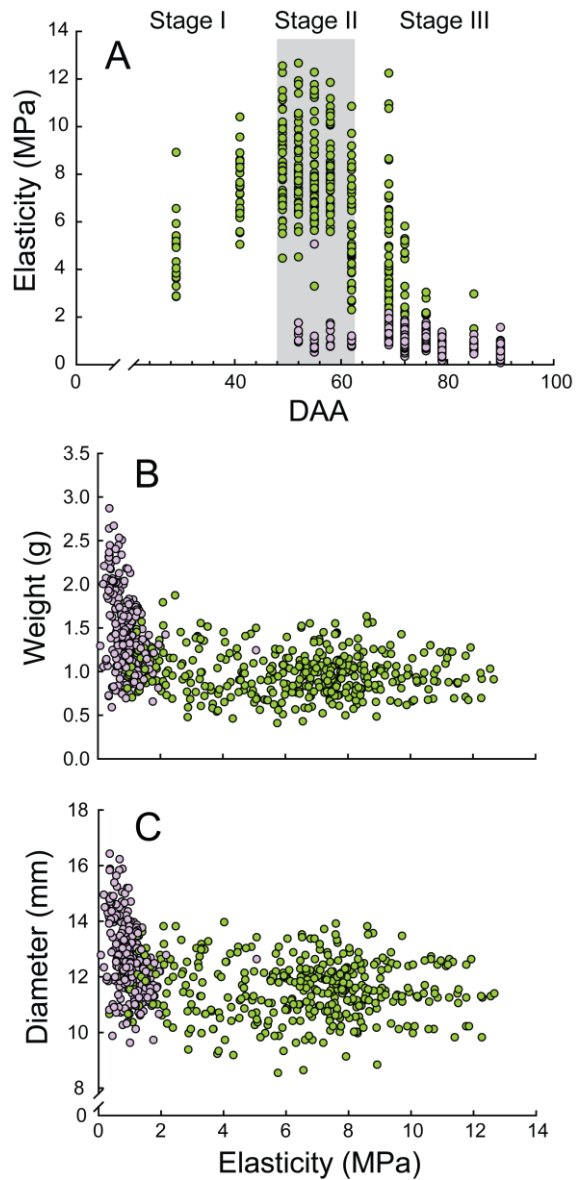

**Figure S4.** Individual berry elasticity in relation to DAA and growth. Values of 685 Control berries harvested from 29 DAA to 90 DAA are reported. Points are colored according to berry skin color. A, Development of fruit elasticity in the vineyard (n=20-100). B, Relationship between elasticity and berry weight. C, Relationship between elasticity and berry diameter.

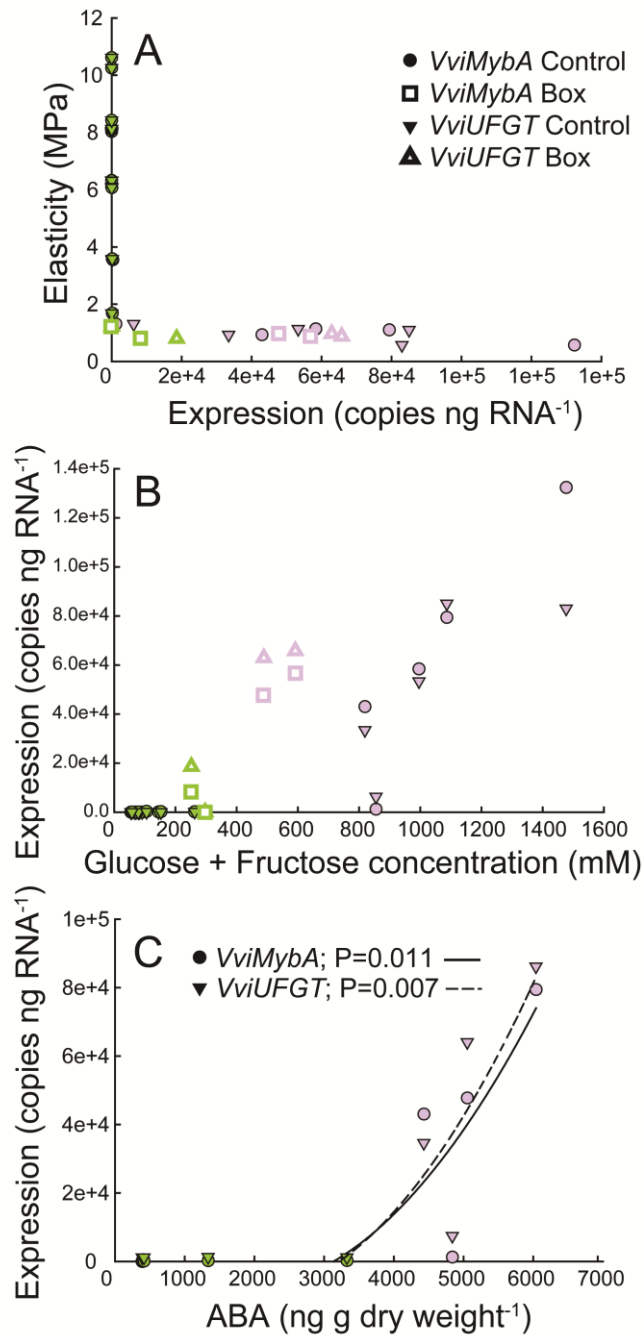

**Figure S5.** Relationships between *VviMybA* and *VviUFGT* expression, sugars, and ABA in berry skins. A, Expression of *VviMybA* (circles) and *VviUFGT* (triangles) in Control (filled) and Box (open). B, Relationship between *VviMybA* and *VviUFGT* expression and sugar accumulation. C, Relationship between ABA concentration and *VviMybA* and *VviUFGT* expression in control berries. Data presented is for berry skins only.

**Table S1.** Effect of the Mock boxes on berry Elasticity, diameter, weight, and color at 79 DAA (when the boxes were removed from Box berries). One way analysis of variance (n=12) was carried out and P values are reported. The different letters indicate significant differences (Tukey's HSD).

| Treatment | Elasticity (MPa) | Berry diameter (mm) | Berry weight (g) | % of red berries |
|-----------|------------------|---------------------|------------------|------------------|
| C         | 0.87 a           | 13.03 a             | 1.41 a           | 86               |
| Mock      | 0.69 a           | 13.26 a             | 1.59 a           | 91               |
| Box       | 1.06 a           | 9.60 b              | 0.98 b           | 0                |
| P value   | 0.202            | 0.0001              | 0.0012           | -                |

**Table S2.** Grapevine V1 annotation codes (Jaillon *et al.*, 2007) of the genes analyzed in this study. Primer sequences are reported in the related references.

| Gene code       | VIT code                                                                         | Reference                          | Notes                                      |
|-----------------|----------------------------------------------------------------------------------|------------------------------------|--------------------------------------------|
| <i>VviUbi</i>   | VIT_16s0098g01190                                                                | Gambetta <i>et al.</i> , 2013      |                                            |
| <i>VviExp1</i>  | VIT_18s0001g01130                                                                | Schlosser <i>et al.</i> , 2008     | VvEXPA19 in Del Santo <i>et al.</i> , 2013 |
| <i>VviExp2</i>  | VIT_13s0067g02930                                                                | Schlosser <i>et al.</i> , 2008     | VvEXPA14 in Del Santo <i>et al.</i> , 2013 |
| <i>VviPL</i>    | VIT_17s0000g09800<br>VIT_17s0000g09810                                           | Schlosser <i>et al.</i> , 2008     |                                            |
| <i>VviPME</i>   | VIT_12s0035g01900                                                                | Schlosser <i>et al.</i> , 2008     |                                            |
| <i>VviXTH</i>   | VIT_06s0061g00550                                                                | Schlosser <i>et al.</i> , 2008     |                                            |
| <i>VviHT1</i>   | VIT_00s0181g00010                                                                | Hayes <i>et al.</i> , 2007         |                                            |
| <i>VviHT2</i>   | VIT_18s0001g05570                                                                | Hayes <i>et al.</i> , 2007         |                                            |
| <i>VviHT3</i>   | VIT_11s0149g00050                                                                | Hayes <i>et al.</i> , 2007         |                                            |
| <i>VviINV</i>   | VIT_09s0002g02320                                                                | Hayes <i>et al.</i> , 2007         |                                            |
| <i>VviUFGT</i>  | VIT_16s0039g02230                                                                | Goto-Yamamoto <i>et al.</i> , 2002 |                                            |
| <i>VviMybA</i>  | VIT_02s0033g00450<br>VIT_02s0033g00410<br>VIT_02s0033g00390<br>VIT_02s0033g00380 | Castellarin <i>et al.</i> , 2007   |                                            |
| <i>VviNCED1</i> | VIT_19s0093g00550                                                                | Castellarin <i>et al.</i> , 2007   |                                            |
| <i>VviNCED2</i> | VIT_10s0003g03750                                                                | Castellarin <i>et al.</i> , 2007   |                                            |

**Table S3.** Solute potential ( $\Psi_s$ ), and glucose and fructose concentration in skin and flesh of control berries (Control) across development.

| Controls<br>DAA | $\Psi_s$ (MPa) |       |          | Glucose (mM) |       |          | Fructose (mM) |       |          |
|-----------------|----------------|-------|----------|--------------|-------|----------|---------------|-------|----------|
|                 | Skin           | Flesh | <i>P</i> | Skin         | Flesh | <i>P</i> | Skin          | Flesh | <i>P</i> |
| 52              | -0.89          | -0.91 | 0.597    | 53.5         | 186.7 | 0.001    | 14.9          | 53.3  | 0.009    |
| 58              | -0.92          | -0.92 | 0.935    | 71.3         | 192.9 | <0.001   | 15.4          | 62.8  | <0.001   |
| 62              | -0.96          | -1.01 | 0.375    | 70.0         | 194.5 | <0.001   | 6.6           | 66.0  | 0.007    |
| 69              | -1.37          | -1.29 | 0.714    | 234.8        | 230.1 | 0.946    | 177.6         | 142.0 | 0.623    |
| 76              | -1.85          | -1.75 | 0.839    | 316.9        | 310.7 | 0.963    | 196.5         | 214.1 | 0.858    |
| 79              | -2.68          | -2.33 | 0.452    | 541.4        | 457.0 | 0.466    | 291.3         | 322.9 | 0.705    |
| 85              | -2.34          | -2.67 | 0.592    | 449.5        | 533.6 | 0.567    | 237.9         | 372.8 | 0.246    |
| 90              | -4.45          | -3.37 | 0.277    | 724.6        | 691.0 | 0.739    | 494.1         | 360.0 | 0.284    |

**Table S4.** Solute potential ( $\Psi_s$ ) and glucose and fructose concentration in skin and flesh of boxed berries (Box) across development.

| Box<br>DAA | $\Psi_s$ (MPa) |       |          | Glucose (mM) |        |          | Fructose (mM) |        |          |
|------------|----------------|-------|----------|--------------|--------|----------|---------------|--------|----------|
|            | Skin           | Flesh | <i>P</i> | Skin         | Flesh  | <i>P</i> | Skin          | Flesh  | <i>P</i> |
| 58         | -0.78          | -0.98 | <0.001   | 62.9         | 67.0   | 0.796    | 18.2          | nd     | <0.001   |
| 69         | -0.96          | -1.10 | 0.479    | 72.3         | 106.2  | 0.559    | 46.5          | 34.0   | 0.815    |
| 79         | -1.05          | -1.09 | 0.796    | 114.3        | 141.6  | 0.503    | 97.1          | 69.3   | 0.460    |
| 80         | -1.10          | -1.17 | 0.450    | 136.5        | 130.4  | 0.861    | 109.9         | 57.7   | 0.156    |
| 85         | -1.86          | -1.85 | 0.988    | 245.6        | 417.6  | 0.104    | 167.0         | 300.0  | 0.255    |
| 90         | -2.10          | -2.20 | 0.822    | 308.4        | 1207.8 | 0.056    | 190.9         | 1127.1 | 0.059    |
